# Supplementary material
Source: HighWire-hosted journal article supplement (http://ajnr-stage2.highwire.org/highwire/filestream/52607/field_highwire_adjunct_files/0/4029.materials.pdf)
Supplement: 4029.materials.pdf [file 4029.materials.pdf]

**On-line Table 1: Baseline characteristics (unadjusted) of the studied patient population as stratified by leukoaraiosis severity<sup>a</sup>**

| Characteristics                                        | All Patients (n = 129) | None, Moderate LA (n = 100) | Severe LA (n = 29) | P Value |
|--------------------------------------------------------|------------------------|-----------------------------|--------------------|---------|
| Age (yr)                                               | 71 (58–80)             | 65 (54–77)                  | 81 (75–85)         | <.001   |
| Female sex                                             | 52 (40%)               | 36 (36%)                    | 16 (55%)           | .085    |
| Admission NIHSS score                                  | 18 (12–21)             | 17 (11–21)                  | 19 (17–22)         | .094    |
| Admission SBP (mm Hg)                                  | 148 (±28)              | 147 (±27)                   | 150 (±28)          | .608    |
| Admission DBP (mm Hg)                                  | 79 (±19)               | 81 (±19)                    | 74 (±17)           | .115    |
| Admission glucose level (mg/dL)                        | 121 (106–142)          | 121 (106–136)               | 120 (112–144)      | .925    |
| Admission creatinine level (mg/dL)                     | 1.00 (0.79–1.30)       | 0.91 (0.73–1.19)            | 1.30 (0.99–1.45)   | .081    |
| Admission white blood cell count (10 <sup>3</sup> /μL) | 9.9 (±3.7)             | 10.1 (±3.7)                 | 9.4 (±3.5)         | .409    |
| HbA1c (%)                                              | 6.1 (±1.1)             | 6.1 (±1.1)                  | 5.8 (±0.6)         | .365    |
| LDL within 24 hours of admission (mg/dL)               | 79 (63–103)            | 80 (61–100)                 | 78 (65–104)        | .933    |
| Time to rtPA (min)                                     | 118 (±61)              | 121 (±63)                   | 105 (±53)          | .400    |
| Preadmission medications                               |                        |                             |                    |         |
| Antiplatelets                                          | 57 (44%)               | 41 (41%)                    | 16 (55%)           | .206    |
| Oral anticoagulant                                     | 18 (14%)               | 11 (11%)                    | 7 (24%)            | .123    |
| Statin                                                 | 60 (47%)               | 44 (44%)                    | 16 (55%)           | .300    |
| Antiglycemic                                           | 17 (13%)               | 13 (13%)                    | 4 (14%)            | 1.000   |
| Antihypertensive                                       | 60 (47%)               | 46 (46%)                    | 14 (48%)           | .836    |
| Pre-existing risk factors                              |                        |                             |                    |         |
| Hypertension                                           | 101 (78%)              | 75 (75%)                    | 26 (90%)           | .125    |
| Dyslipidemia                                           | 75 (58%)               | 56 (56%)                    | 19 (66%)           | .399    |
| Diabetes                                               | 29 (23%)               | 22 (22%)                    | 7 (24%)            | .804    |
| Prior stroke or transient ischemic attack <sup>b</sup> | 29 (23%)               | 16 (16%)                    | 13 (45%)           | .002    |
| Atrial fibrillation                                    | 44 (34%)               | 25 (25%)                    | 19 (66%)           | .001    |
| Coronary artery disease                                | 48 (37%)               | 32 (32%)                    | 16 (55%)           | .030    |
| Congestive heart failure                               | 26 (20%)               | 19 (19%)                    | 7 (24%)            | .601    |
| Peripheral vascular disease                            | 13 (10%)               | 6 (6%)                      | 7 (24%)            | .009    |
| Tobacco use                                            | 46 (36%)               | 35 (35%)                    | 11 (38%)           | .827    |
| Alcohol abuse                                          | 15 (12%)               | 13 (13%)                    | 2 (7%)             | .518    |
| Final TOAST stroke mechanism                           |                        |                             |                    | .014    |
| Large-artery atherosclerosis                           | 25 (19%)               | 22 (22%)                    | 3 (10%)            |         |
| Cardioembolic                                          | 77 (60%)               | 53 (53%)                    | 24 (83%)           |         |
| Stroke of other or undetermined cause                  | 27 (21%)               | 25 (25%)                    | 2 (7%)             |         |
| Leukoaraiosis grade (van Swieten score)                |                        |                             |                    | <.001   |
| 0                                                      | 47 (36%)               | 47 (47%)                    | 0 (0%)             |         |
| 1                                                      | 30 (23%)               | 30 (30%)                    | 0 (0%)             |         |
| 2                                                      | 23 (18%)               | 23 (23%)                    | 0 (0%)             |         |
| 3                                                      | 13 (10%)               | 0 (0%)                      | 13 (45%)           |         |
| 4                                                      | 16 (12%)               | 0 (0%)                      | 16 (55%)           |         |
| Acute intervention <sup>c</sup>                        |                        |                             |                    |         |
| IV rtPA                                                | 74 (57%)               | 55 (55%)                    | 19 (66%)           | .395    |
| IA rtPA                                                | 78 (61%)               | 61 (61%)                    | 17 (59%)           | .832    |
| Mechanical thrombectomy                                | 109 (85%)              | 89 (89%)                    | 20 (69%)           | .017    |
| Time to first run (min)                                | 252 (180–338)          | 256 (190–345)               | 210 (146–315)      | .483    |
| Procedure duration (min)                               | 92 (60–135)            | 99 (60–142)                 | 90 (70–120)        | .407    |
| Time to recanalization (min) <sup>d</sup>              | 354 (285–443)          | 359 (299–439)               | 335 (271–451)      | .329    |
| Good collaterals (grades 3–4)                          | 67 (55%)               | 48 (51%)                    | 19 (70%)           | .084    |
| Good recanalization (TICI 2b–3)                        | 104 (81%)              | 80 (80%)                    | 24 (83%)           | 1.000   |
| Parenchymal hemorrhage                                 | 37 (29%)               | 26 (26%)                    | 11 (38%)           | .246    |
| Discharge mRS (0–2)                                    | 25 (19%)               | 23 (23%)                    | 2 (7%)             | .063    |
| Discharge mRS (0–3)                                    | 45 (35%)               | 42 (42%)                    | 3 (10%)            | .002    |
| In-hospital mortality (mRS 6)                          | 42 (33%)               | 25 (25%)                    | 17 (59%)           | .001    |
| Good 3-month mRS                                       | 55 (43%)               | 51 (51%)                    | 4 (14%)            | <.001   |

**Note:**—LA indicates leukoaraiosis; LDL, low-density lipoprotein; TOAST, Trial of Org 10172 in Acute Stroke Treatment; IA, intra-arterial; SBP, systolic blood pressure; DBP, diastolic blood pressure; HbA1c, glycated hemoglobin.

<sup>a</sup> Data are No. (%), mean (± SD), or median (interquartile range).

<sup>b</sup> Prior lesion not in the same hemisphere as current lesion.

<sup>c</sup> Most patients had >1 treatment modality.

<sup>d</sup> Defined as the time to final attempt at recanalization.

**On-line Table 2: Baseline characteristics (unadjusted) of the studied patient population stratified according to 90-day outcome<sup>a</sup>**

| Characteristics                                        | All Patients (n = 129) | Good Outcome (n = 55) | Poor Outcome (n = 74) | P Value |
|--------------------------------------------------------|------------------------|-----------------------|-----------------------|---------|
| Age (yr)                                               | 71 (58–80)             | 63 (51–74)            | 77 (64–83)            | <.001   |
| Female sex                                             | 52 (40%)               | 20 (36%)              | 32 (43%)              | .471    |
| Admission NIHSS score                                  | 18 (12–21)             | 14 (10–19)            | 18 (16–22)            | <.001   |
| Admission SBP (mm Hg)                                  | 148 (±28)              | 146 (±24)             | 149 (±30)             | .551    |
| Admission DBP (mm Hg)                                  | 79 (±19)               | 79 (±16)              | 80 (±20)              | .813    |
| Admission glucose level (mg/dL)                        | 121 (106–142)          | 117 (105–130)         | 124 (108–144)         | .032    |
| Admission creatinine level (mg/dL)                     | 1.00 (0.79–1.30)       | 0.90 (0.79–1.14)      | 1.10 (0.80–1.40)      | .020    |
| Admission white blood cell count (10 <sup>3</sup> /μL) | 9.9 (±3.7)             | 9.6 (±3.0)            | 10.1 (±4.1)           | .402    |
| HbA1c (%)                                              | 6.1 (±1.1)             | 6.0 (±0.8)            | 6.1 (±1.2)            | .443    |
| LDL within 24 hours of admission (mg/dL)               | 79 (63–103)            | 89 (66–115)           | 74 (59–92)            | .031    |
| Time to rtPA (min)                                     | 118 (±61)              | 124 (±78)             | 113 (±46)             | .518    |
| Preadmission medications                               |                        |                       |                       |         |
| Antiplatelets                                          | 57 (44%)               | 20 (36%)              | 37 (50%)              | .152    |
| Oral anticoagulant                                     | 18 (14%)               | 9 (16%)               | 9 (12%)               | .609    |
| Statin                                                 | 60 (47%)               | 25 (45%)              | 35 (47%)              | .860    |
| Antiglycemic                                           | 17 (13%)               | 4 (7%)                | 13 (18%)              | .116    |
| Antihypertensive                                       | 60 (47%)               | 27 (49%)              | 33 (45%)              | .721    |
| Pre-existing risk factors                              |                        |                       |                       |         |
| Hypertension                                           | 101 (78%)              | 41 (75%)              | 60 (81%)              | .395    |
| Dyslipidemia                                           | 75 (58%)               | 34 (62%)              | 41 (55%)              | .477    |
| Diabetes                                               | 29 (23%)               | 12 (17%)              | 17 (23%)              | 1.000   |
| Prior stroke or TIA <sup>b</sup>                       | 29 (23%)               | 9 (16%)               | 20 (27%)              | .201    |
| Atrial fibrillation                                    | 44 (34%)               | 12 (22%)              | 32 (43%)              | .014    |
| Coronary artery disease                                | 48 (37%)               | 15 (27%)              | 33 (45%)              | .065    |
| Congestive heart failure                               | 26 (20%)               | 7 (13%)               | 19 (26%)              | .079    |
| Peripheral vascular disease                            | 13 (10%)               | 2 (4%)                | 11 (15%)              | .042    |
| Tobacco use                                            | 46 (36%)               | 19 (35%)              | 27 (37%)              | .854    |
| Alcohol abuse                                          | 15 (12%)               | 8 (15%)               | 7 (10%)               | .414    |
| Final TOAST stroke mechanism                           |                        |                       |                       | .193    |
| Large-artery atherosclerosis                           | 25 (19%)               | 12 (22%)              | 13 (18%)              |         |
| Cardioembolic                                          | 77 (60%)               | 28 (51%)              | 49 (66%)              |         |
| Stroke of other or undetermined cause                  | 27 (21%)               | 15 (27%)              | 12 (16%)              |         |
| Leukoaraiosis grade (van Swieten scale score)          |                        |                       |                       | .005    |
| 0                                                      | 47 (36%)               | 27 (49%)              | 20 (27%)              |         |
| 1                                                      | 30 (23%)               | 13 (24%)              | 17 (23%)              |         |
| 2                                                      | 23 (18%)               | 11 (20%)              | 11 (15%)              |         |
| 3                                                      | 13 (10%)               | 2 (4%)                | 12 (16%)              |         |
| 4                                                      | 16 (12%)               | 2 (4%)                | 14 (19%)              |         |
| Acute intervention <sup>c</sup>                        |                        |                       |                       |         |
| IV rtPA                                                | 74 (57%)               | 31 (56%)              | 43 (58%)              | .859    |
| IA rtPA                                                | 78 (61%)               | 35 (64%)              | 43 (58%)              | .587    |
| Mechanical thrombectomy                                | 109 (85%)              | 48 (87%)              | 61 (82%)              | .624    |
| Time to first run, (min)                               | 252 (180–338)          | 272 (177–360)         | 241 (180–317)         | .482    |
| Procedure duration (min)                               | 92 (60–135)            | 91 (60–126)           | 98 (70–149)           | .254    |
| Good collaterals (grade 4)                             | 29 (24%)               | 12 (23%)              | 17 (25%)              | 1.000   |
| Good recanalization (TICI 2b–3)                        | 104 (81%)              | 50 (91%)              | 54 (73%)              | .013    |
| Parenchymal hemorrhage                                 | 37 (29%)               | 7 (13%)               | 30 (41%)              | .001    |

**Note:**—LDL, low-density lipoprotein; TOAST, Trial of Org 10172 in Acute Stroke Treatment; IA, intra-arterial; SBP, systolic blood pressure; DBP, diastolic blood pressure; HbA1c, glycated hemoglobin.

<sup>a</sup> Data are No. (%), mean (± SD), or median (interquartile range).

<sup>b</sup> Prior lesion not in the same hemisphere as current lesion.

<sup>c</sup> Most patients had >1 acute treatment modality.

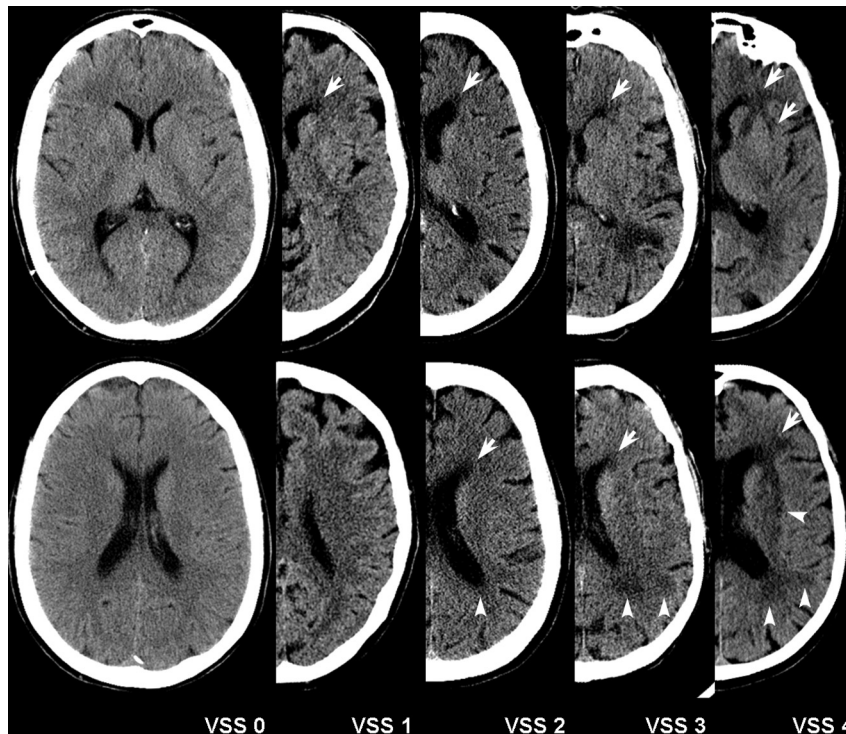

**ON-LINE FIG 1.** Representative noncontrast CT depicting advancing degrees of leukoaraiosis. The severity of leukoaraiosis was graded from 0 (no leukoaraiosis) to 2 (confluent white matter involvement from the ventricles to the gray matter) for the respective anterior (*white arrows*) and posterior (*arrowheads*) white matter at the levels of the choroid plexus (top row), section through the cella media (bottom row), and centrum semiovale (not shown). Summing the score from the anterior and posterior regions provides a total van Swieten scale score ranging from 0 to 4.<sup>28</sup>

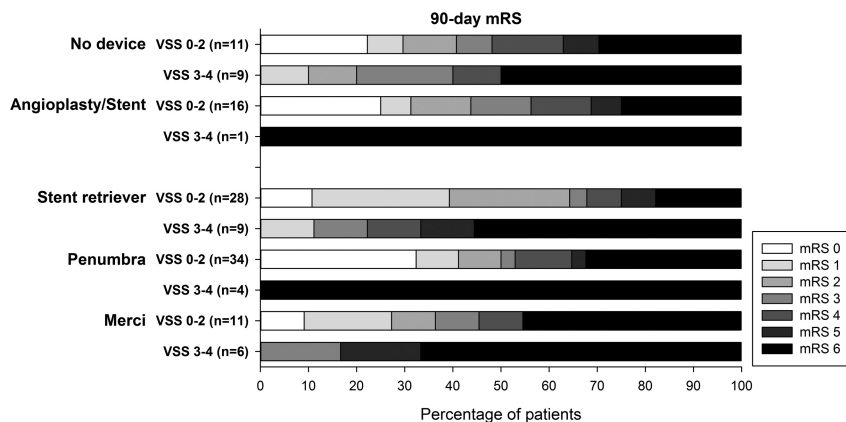

**ON-LINE FIG 2.** Outcome as stratified by leukoaraiosis severity and device type. Functional outcome at 3 months according to leukoaraiosis severity (unadjusted) and as stratified by an interventional approach. Scores of  $\leq 2$  or return to baseline on the mRS is considered a good outcome (darker shades indicate worse outcomes). Because most patients were treated with several modalities, they are grouped according to the interventional approach that achieved recanalization or that was used last if recanalization was not achieved. The van Swieten scale is the following: 0–2 = absent-to-moderate and 3–4 = severe leukoaraiosis.
